# Supplementary material
Source: HighWire-hosted journal article supplement (doi:10.1101/rna.078188.120)
Supplement: Supplemental_Legends_Table_S4_TableS5.docx [file Supplemental_Legends_Table_S4_TableS5.docx]

**Supplemental Figure 1: Characterization of disome footprints in bacteria.**

(A) Meta-gene plots around disome pause sites (Fig 2A) for published monosome profiling [(Oh et al. 2011; Woolstenhulme et al. 2015; Mohammad et al. 2019)](https://paperpile.com/c/BaxzXw/ve9xP+G1pLM+RhgK), which were prepared with different enzymes and cell harvest methods. The conditions (cell harvest method, 3′ sequence addition enzymes/method, and circularization enzymes) are shown in each panel.

(B and C) Metagene plots around the UGG codon, which represents an anti-SD-like sequence [(Mohammad et al. 2016)](https://paperpile.com/c/BaxzXw/ZFS9d), for monosome profiling and disome profiling. In B, monosome footprints are sub-grouped based on length (short, 23-27 nt and long, 35-40 nt).

(D) Pie chart indicating the positions (CDS or stop codon) of disome pause sites defined in Fig 2E.

(E) Schematic representation of high-salt wash ribosome profiling (left). The monosome occupancies on the stop codon with disome pauses with or without high-salt wash are shown (right).

**Supplemental Figure 2: Motifs associated with disome pause sites.**

(A and B) Net charge (A) and hydrophobicity (Kyte-Doolittle scale) of the amino acids upstream of disome (top) and monosome (bottom) pause sites.

(C) Motif associated with disome (top) and monosome (bottom) pause sites. Amino acid sequences enriched around the pause sites were analyzed by kpLogo [(Wu and Bartel 2017)](https://paperpile.com/c/BaxzXw/fwSxk).

**Supplemental Figure 3: Comparison of disome and mosome pause sites to iNP.**

(A) Pie chart showing the results of earlier *in vitro* iNP (left) or *in vivo* iNP (right) [(Chadani et al. 2016)](https://paperpile.com/c/BaxzXw/R8j5T).

(B) Numbers of overlapping genes with disome pause sites and those analyzed in *in vivo* (left) and *in vitro* (right) iNP [(Chadani et al. 2016)](https://paperpile.com/c/BaxzXw/R8j5T) (top). On the bottom, the correlation between the molecular weight (M.W.) of polypeptidyl-tRNA predicted by gel migration in *in vivo* (left) and *in vitro* (right) iNP and that identified in ribosome profiling are shown.

(C) The same as (B) but for the comparison with monosome pause sites.

**Supplemental Figure 4: Characterization of ribosome pause on *ycbZ* by iNP.**

(A) *In vitro* iNP for *ycbZ* mRNAs. RNase-sensitive polypeptidyl-tRNAs are indicated by arrowheads. *secM* mRNA were used as positive control.

(B) Mutational analysis of the *ycbZ* motif. The quantification is shown in Fig. 4E. Mutations in residues are indicated in Fig. 4D. Pep-tRNA, polypeptidyl-tRNA.

**Supplemental Figure 5: Preparation of *ycbZ*-stalled ribosomes for cryo-EM analysis.**

(A) Schematic representation of the RNC purification procedure.

(B) Western blotting for polypeptidyl-tRNA probed by the HA tag (left) and Coomassie Brilliant Blue (CBB)-stained gel of proteins in RNC (right).

(C) Sucrose density gradient of affinity-purified RNCs. The fractions corresponding to 70S were collected for downstream cryo-EM analysis.

**Supplemental Figure 6: Characterization of the structure of *ycbZ*-stalled ribosomes.**

(A) Image processing of the 70S ribosomes stalled with *ycbZ*. In total, 77k particles were extracted followed by 2D classification to obtain good particles (63k particles). The dataset converged into the consensus reconstruction, and then 3D classification was performed. The dataset was classified into six subgroups. The major population (64%) assigned to the 70S ribosomes in a nonrotated state was further processed. The obtained refined cryo-EM structure has a resolution of 3.3 Å.

(B and C) Fourier shell correlation curves of the *ycbZ*-stalled ribosome (B) and models vs. cryo-EM maps (C) are shown.

(D) Color-coded local resolution distributions of cryo-EM maps for the *ycbZ*-stalled ribosome.

**Supplemental Figure 7: Characterization of P-site tRNA in the *ycbZ*-stalled ribosome.**

(A) Q-score estimation for the models of residues involved in the codon-anticodon interactions of Pro or Asn to the cryo-EM reconstruction. The model for the Pro codon (CCG) with tRNAProCGG (left) or the model for the Asn codon (AAC) with the tRNAAsnGUU model (right) is superimposed on the cryo-EM reconstruction. The Q-score [(Pintilie et al. 2020)](https://paperpile.com/c/BaxzXw/vZHqW) for each residue is shown next to the labels.

(B and C) Magnified view of the CCA end of the *ycbZ*-stalled 70S ribosome and comparison with the tRNA-bound 70S ribosome in the pre-attack state. (B) The atomic model is superimposed on the cryo-EM reconstruction. (C) Structural comparison of the model obtained in this study with the structure of the tRNA-bound 70S ribosome in the pre-attack state (PDB ID: 1VY4) [(Polikanov et al. 2014)](https://paperpile.com/c/BaxzXw/gJkDW).

(D) Western blot analysis of the translation product (probed by HA epitope) from the *ycbZ* motif reporter subjected to SDS-PAGE at neutral pH. The reaction was further treated with puromycin. Pep-tRNA, polypeptidyl-tRNA.

**Supplemental Table 1: List of disome and monosome pauses defined in standard monosome profiling.**

Each A-site codon position (note that the first AUG codon was counted as position 0) of the identified ribosome pause site is listed with its b number identifier, gene name, mosonome and disome occupancy scores, and pause type descriptions (whether the site corresponds to monsome pause site or disome pause site).

**Supplemental Table 2: List of disome pauses with systematic iNP data.**

Each A site codon position (note that the first AUG codon was counted as position 0) of the disome pause sites is listed with its b number identifier, gene name, polypeptidyl-tRNA molecular weight predicted disome pause sites, polypeptidyl-tRNA molecular weight estimated by *in vitro* and *in vivo* iNP[*(Chadani et al. 2016)*](https://paperpile.com/c/BaxzXw/R8j5T), and puromycin resistance in the *in vitro* iNP.

**Supplemental Table 3: List of monosome pauses with systematic iNP data.**

Each A site codon position (note that the first AUG codon was counted as position 0) of the monoome pause sites is listed with its b number identifier, gene name, polypeptidyl-tRNA molecular weight predicted monosome pause sites, polypeptidyl-tRNA molecular weight estimated by *in vitro* and *in vivo* iNP[*(Chadani et al. 2016)*](https://paperpile.com/c/BaxzXw/R8j5T), and puromycin resistance in the *in vitro* iNP.

**Supplemental Table 4: Cryo-EM data collection, model building, refinement, and validation statistics.**

|  | *ycbZ*-stalled ribosome  (EMDB-30431)  (PDB 7CPJ) |
| --- | --- |
| **Data collection and processing** |  |
| Magnification | 23,500 |
| Voltage (kV) | 200 |
| Electron exposure (e–/Å2) | 50 |
| Defocus range (μm) | 1.0-3.0 |
| Pixel size (Å) | 1.47 |
| Symmetry | *C*1 |
| Initial particle images (no.) | 77,002 |
| Final particle images (no.) | 40,231 |
| Map resolution (Å)  FSC threshold | 3.3  0.143 |
| Map sharpening *B* factor (Å2) | -64.57 |
|  |  |
| **Refinement** |  |
| Model composition  Nonhydrogen atoms  Protein residues  RNA residues | 145,941  5,951  4,639 |
| R.m.s. deviations  Bond lengths (Å)  Bond angles (°) | 0.010  0.884 |
| Validation  MolProbity score  Clashscore  Poor rotamers (%)  RNA pucker outliers (%) | 2.26  12.63  0.29  0 |
| Ramachandran plot  Favored (%)  Allowed (%)  Disallowed (%) | 85.70  13.82  0.48 |

**Supplemental Table 5: A list of plasmids used in this study.**

| Plasmid | Reference |
| --- | --- |
| *pCA24N-ycbZ* | This study |
| *pCA24N-secM* | Kitagawa *et al*., 2005 |
| *pCA24N-ycbZ motif (WT)* | This study |
| *pCA24N-ycbZ motif (I557A)* | This study |
| *pCA24N-ycbZ motif (E559A)* | This study |
| *pCA24N-ycbZ motif (R560A)* | This study |
| *pCA24N-ycbZ motif (I561A)* | This study |
| *pCA24N-ycbZ motif (W579A)* | This study |
| *pCA24N-ycbZ motif (L580A)* | This study |
| *pCA24N-ycbZ motif (W579A-L580A)* | This study |
| *pCA24N-ycbZ motif (E559A-R560A-I561A)* | This study |
| *pCA24N-ycbZ motif (I557A-E559A-R560A-I561A-W579A-L580A)* | This study |
| *pCA24N-ycbZ motif (I584A-P585A-N586A)* | This study |
| *pCA24N-ycbZ motif (P585A-N586A)* | This study |
| *pCA24N-ycbZ motif (P585A)* | This study |
| *pCA24N-ycbZ motif (N586A)* | This study |
| *pCA24N-SBP* | This study |
| *pCA24N-ycbZ motif-triple stops* | This study |
